# Supplementary material for: Defective by design: vanadium-substituted iron oxide nanoarchitectures as cation-insertion hosts for electrochemical charge storage
Source: Royal Society of Chemistry journal article supplement (doi:10.1039/c5ta01507c), 2015-01-01
Supplement: c5ta01507c1.pdf [file c5ta01507c1.pdf]

## Defective by design: Vanadium-substituted iron oxide nanoarchitectures as cation-insertion hosts for electrochemical charge storage

Christopher N. Chervin,<sup>\*a</sup> Jesse S. Ko,<sup>b</sup> Bryan W. Miller,<sup>a</sup> Lisa Dudek,<sup>c</sup> Azzam N. Mansour,<sup>d</sup> Martin D. Donakowski,<sup>a</sup> Todd Brintlinger,<sup>e</sup> Pavel Gogotsi,<sup>a</sup> Soma Chattopadhyay,<sup>f,g</sup> Tomohiro Shibata,<sup>g</sup> Joseph F. Parker,<sup>a</sup> Benjamin P. Hahn,<sup>a</sup> Debra R. Rolison,<sup>a</sup> and Jeffrey W. Long<sup>\*a</sup>

<sup>a</sup> U. S. Naval Research Laboratory, Surface Chemistry Branch (Code 6170), Washington, D.C. 20375, USA

<sup>b</sup> Department of Materials Science and Engineering, University of California at Los Angeles (UCLA), Los Angeles, California 90095, USA

<sup>c</sup> Department of Chemistry and Biochemistry, University of California at Los Angeles (UCLA), Los Angeles, California 90095, USA

<sup>d</sup> Naval Surface Warfare Center, Carderock Division, Materials and Power Systems Branch (Code 6160), West Bethesda, MD, 20817, USA

<sup>e</sup> U. S. Naval Research Laboratory, Materials and Sensors Branch (Code 6360), Washington, D.C. 20375, USA

<sup>f</sup> Physical Sciences Department, Elgin Community College, 1700 Spartan Drive, Elgin, IL 60123.

<sup>g</sup> Previously at: Sector 10 ID, CSRR-IIT, Advanced Photon Source, 9700 S. Cass Avenue, Lemont, IL 60439.

\*Corresponding authors: christopher.chervin@nrl.navy.mil (C. N. Chervin); jeffrey.long@nrl.navy.mil (J. W. Long)

Figure S1

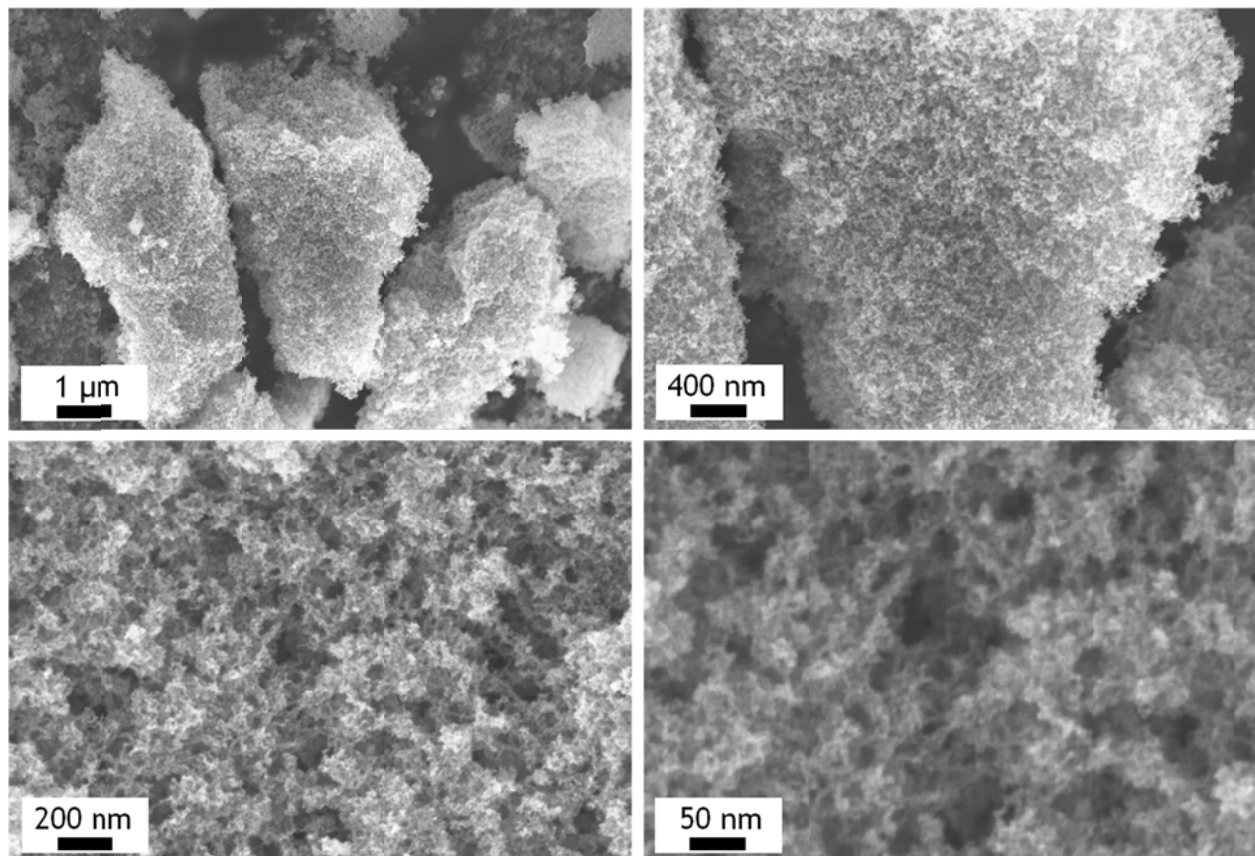

**Fig S1** Scanning electron micrographs of an as-synthesized  $VFe_2O_x$  aerogel at different magnifications. The low-magnification images (upper) demonstrate that the through-connected porosity permeates across the large length-scales of aggregates that remain after pulverizing the aerogel monolith. The high-magnification images (lower) show the connected, tendril-like solid-network that connects the nanometric oxide particles comprising the aerogel.

Figure S2

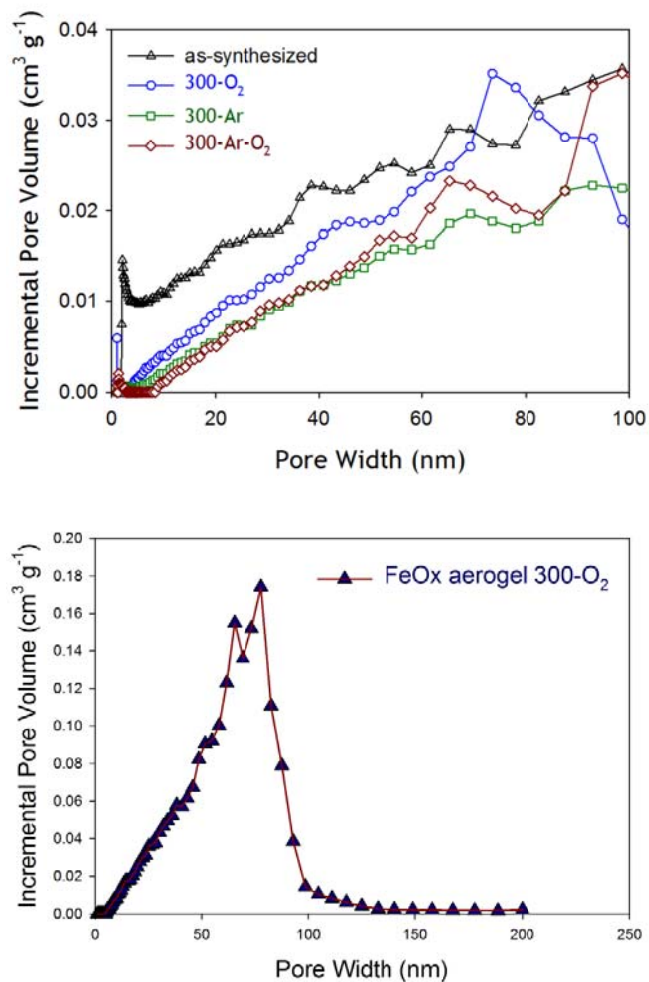

**Fig S2** Pore size distribution plots derived from N<sub>2</sub>-sorption porosimetry for (top) VFe<sub>2</sub>Ox aerogels and (bottom) a 300-O<sub>2</sub> FeOx aerogel.

Figure S3

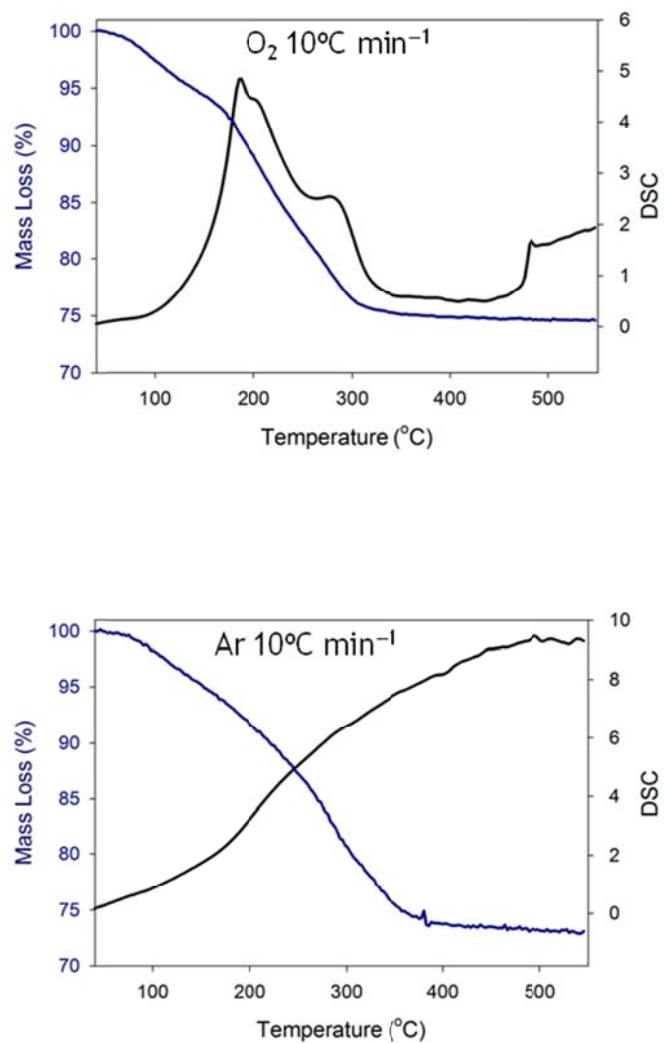

**Fig S3** Thermogravimetric analysis and differential scanning calorimetry of as-synthesized  $VFe_2O_x$  aerogels at  $10^\circ\text{C min}^{-1}$  under flowing:  $O_2$  (top) and Ar (bottom).

Figure S4

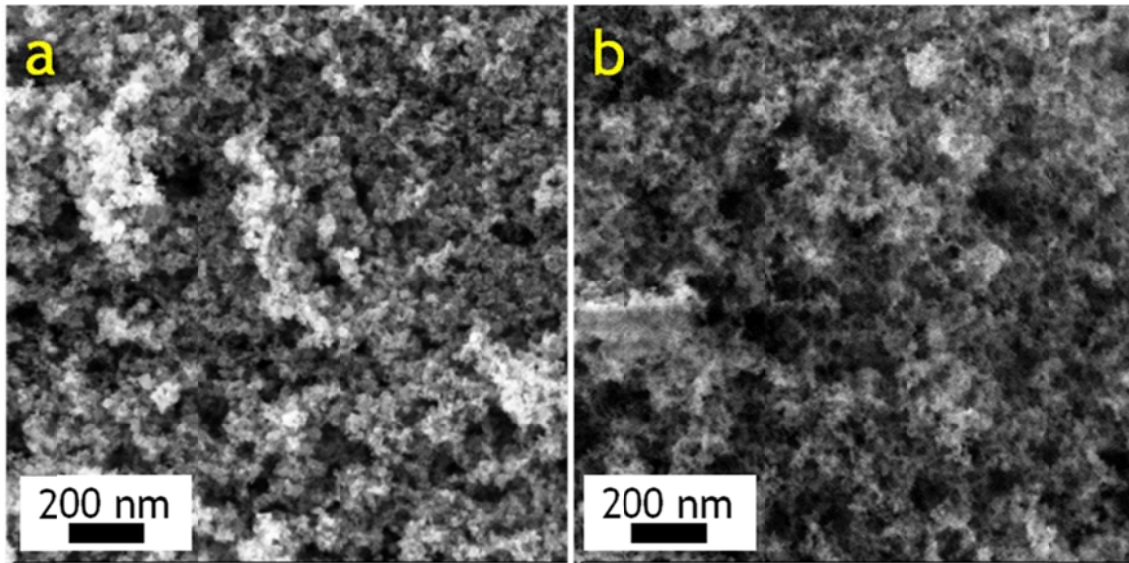

**Fig S4** Scanning electron micrographs of  $VFe_2O_x$  aerogels: (a) 300-Ar, and (b) 300-Ar- $O_2$ .

Figure S5

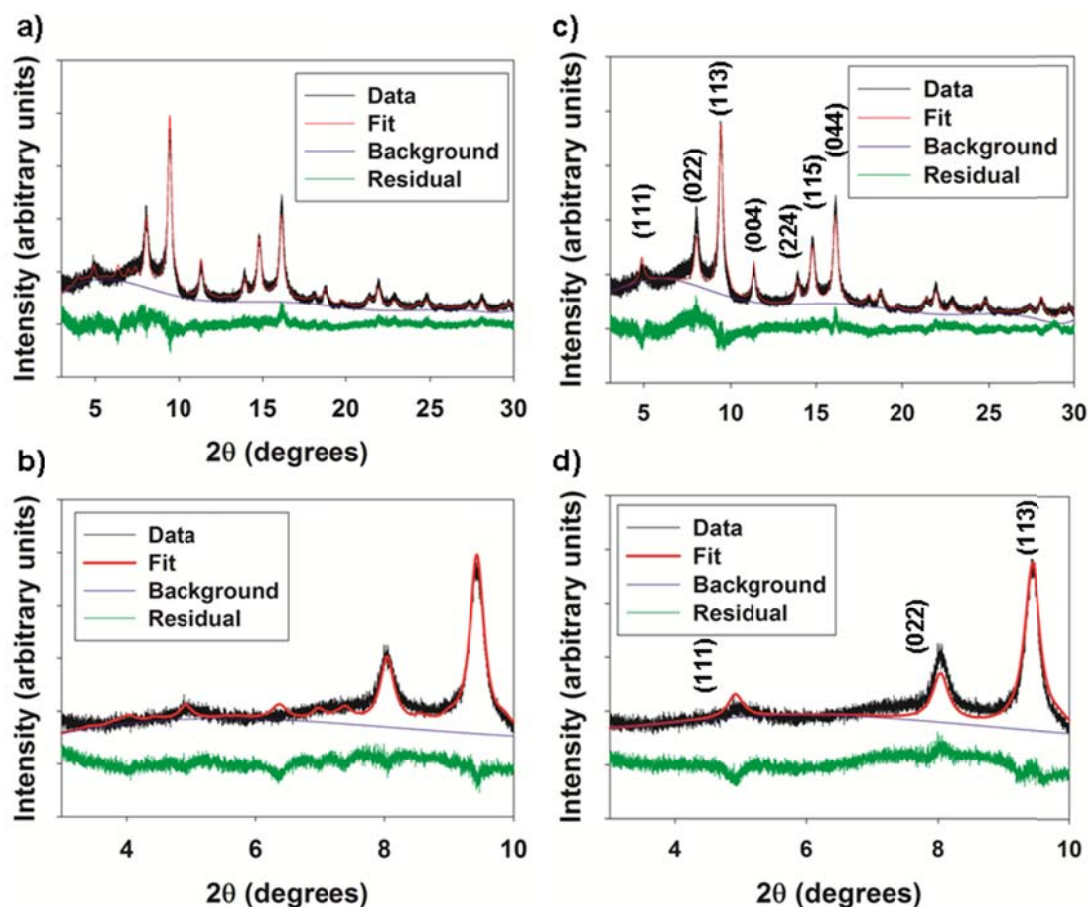

**Fig S5** Rietveld fit of synchrotron powder X-ray diffraction data (PXRD) for a 300-Ar VFe<sub>2</sub>O<sub>x</sub> aerogel. ( $\lambda = 0.413851 \text{ \AA}$ ). a) Fit of 300-Ar with a maghemite structure (spacegroup *P4<sub>3</sub>32*) from 3–30°, b) Fit of 300-Ar with a maghemite structure shown from 3–10°, c) fit of 300-Ar with a magnetite structure (spacegroup *Fd-3m*) from 3–30°, d) Fit of 300-Ar with a magnetite structure shown from 3–10°. The fits at low 2θ with a magnetite structure show peaks that are not present in the data – the (nano)crystalline phase thus more correctly fits to the magnetite structure.

Figure S6

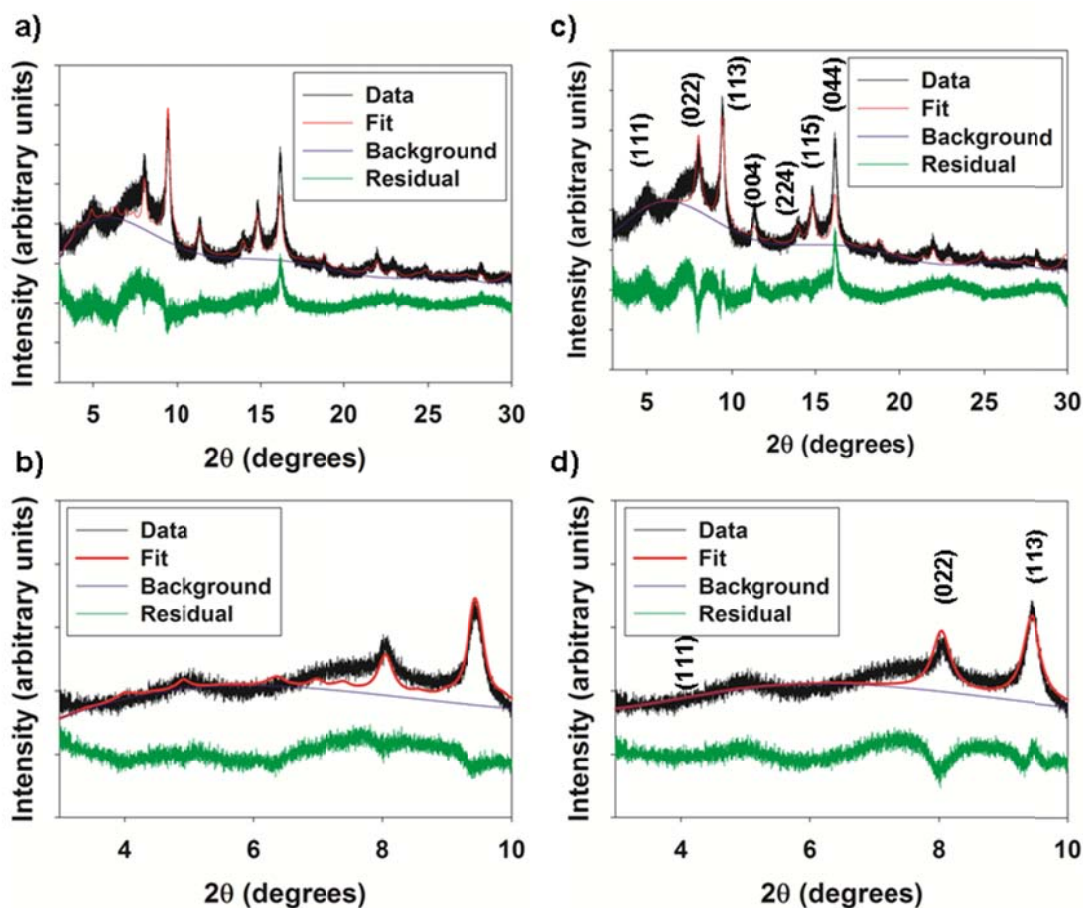

**Fig S6** Rietveld fit of synchrotron powder X-ray diffraction data (PXRD) for a 300-Ar-O<sub>2</sub> VFe<sub>2</sub>O<sub>x</sub> aerogel ( $\lambda = 0.413851 \text{ \AA}$ ) a) Fit of 300-Ar-O<sub>2</sub> with a maghemite structure (spacegroup  $P4_332$ ) from 3 – 30°, b) Fit of 300-Ar-O<sub>2</sub> with a maghemite structure shown from 3–10°, c) fit of 300-Ar-O<sub>2</sub> with a magnetite structure (spacegroup  $Fd-3m$ ) from 3–30°, d) Fit of 300-Ar-O<sub>2</sub> with a magnetite structure shown from 3–10°. The fits at low  $2\theta$  with a maghemite structure show peaks that are not present in the data – the (nano)crystalline phase thus more correctly fits to the magnetite structure.

Figure S7

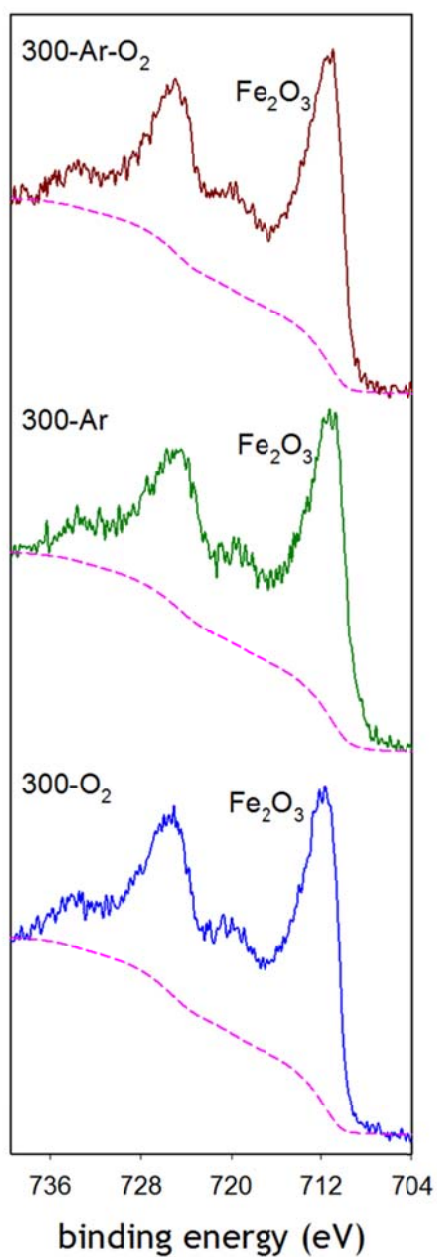

**Fig S7** X-ray photoelectron spectra of the Fe<sub>2p<sub>1/2</sub></sub> binding energy for VFe<sub>2</sub>O<sub>x</sub> aerogels: 300-O<sub>2</sub> (—), 300-Ar (—), 300-Ar-O<sub>2</sub> (—), and background fit (---).



Figure S8

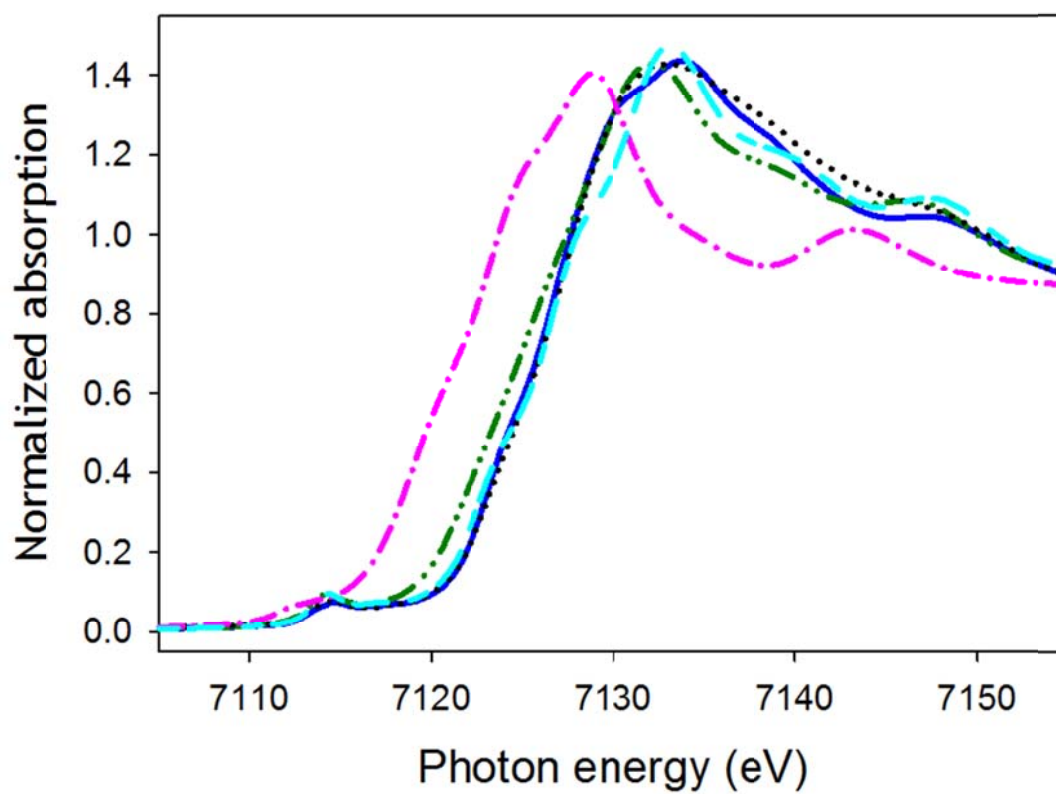

**Fig S8** Fe K-edge XANES for FeO<sub>x</sub> aerogels: 300-O<sub>2</sub> (—), 300-Ar (-••-), and as-synthesized (•••); and iron oxide standards: FeO (-•-•-) and Fe<sub>2</sub>O<sub>3</sub> (- - -).

Figure S9

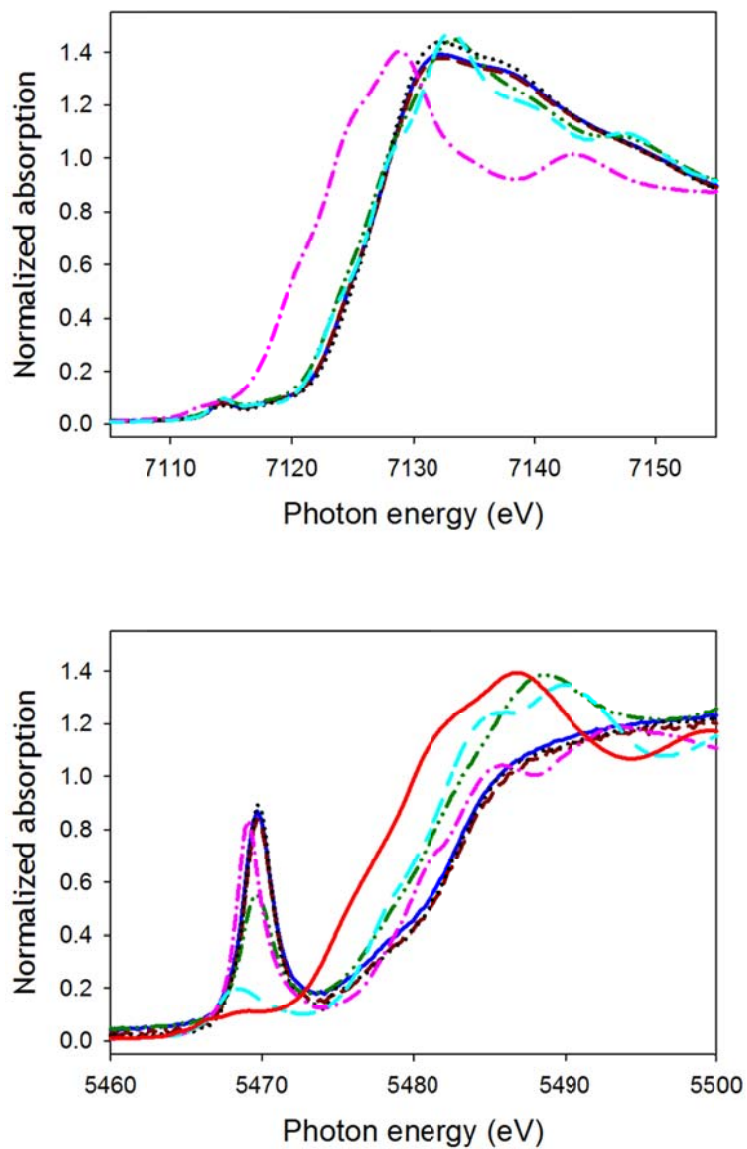

**Fig S9** Fe (top) and V (bottom) K-edge XANES for  $\text{VFe}_2\text{O}_x$  aerogels: 300- $\text{O}_2$  (—), 300-Ar- $\text{O}_2$  (---), 300-Ar (-•-), and as-synthesized (•••). Iron oxide standards (top): FeO (-•-) and  $\text{Fe}_2\text{O}_3$  (- —); vanadium oxide standards (bottom):  $\text{V}_2\text{O}_5$  (-•-),  $\text{VO}_2$  (- —), and  $\text{V}_2\text{O}_3$  (—).

Figure S10

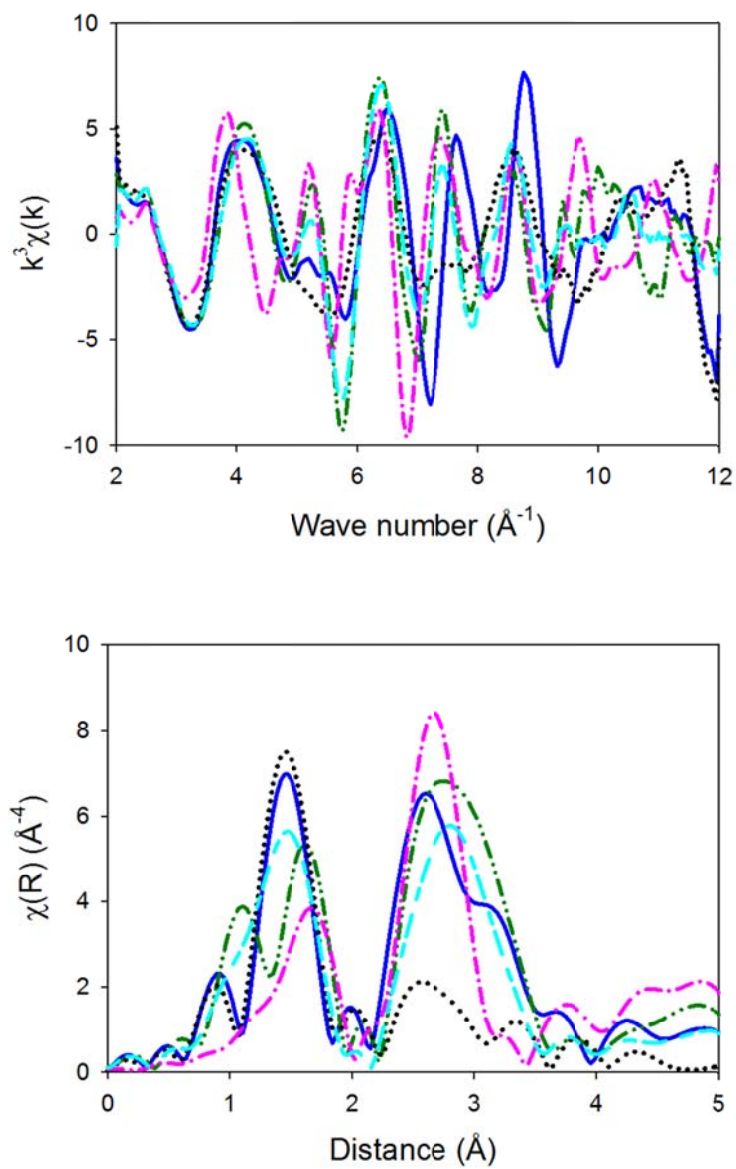

**Fig S10** Fe K-edge EXAFS spectra (top) and Fourier transform of EXAFS spectra (bottom) for FeO<sub>x</sub> aerogels: 300-O<sub>2</sub> (—), 300-Ar (---•---) and as-synthesized (•••). Iron oxide standards: FeO (—•—) and Fe<sub>2</sub>O<sub>3</sub> (---).

Figure S11

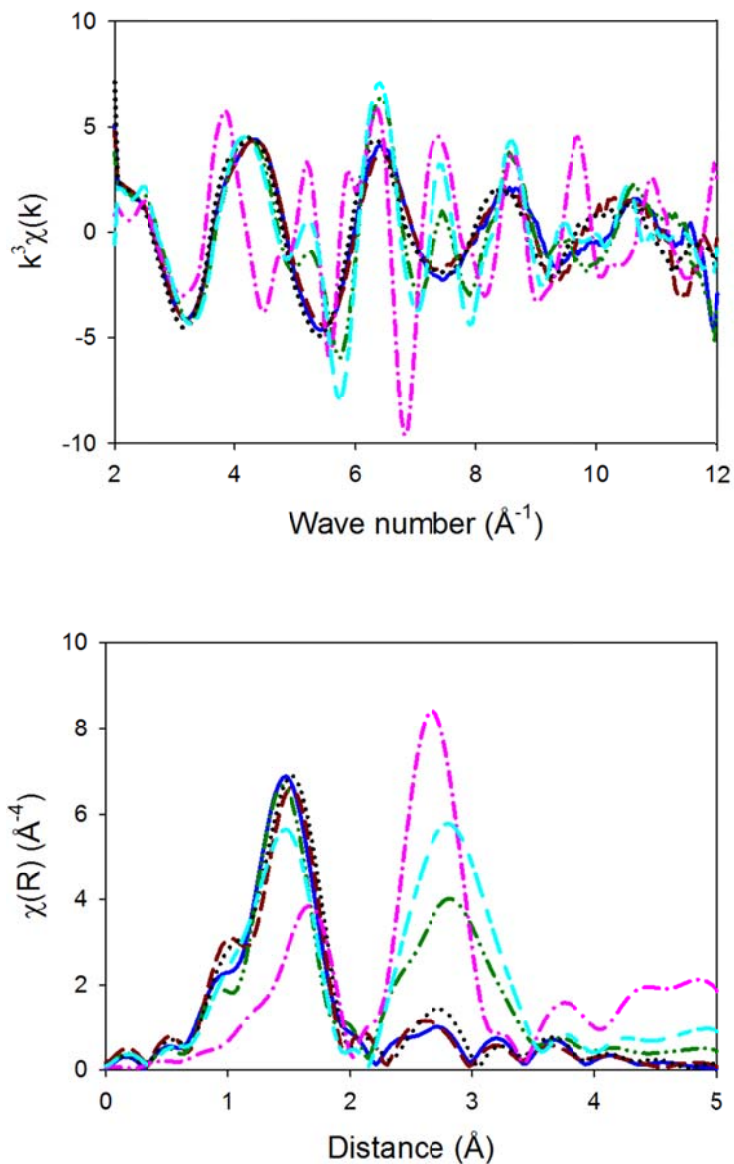

**Fig S11** Fe K-edge EXAFS spectra (top) and Fourier transform of EXAFS spectra (bottom) for VFe<sub>2</sub>O<sub>x</sub> aerogels: 300-O<sub>2</sub> (—), 300-Ar-O<sub>2</sub> (- - -), 300-Ar (-••-), and as-synthesized (•••). Iron oxide standards: FeO (- • -) and Fe<sub>2</sub>O<sub>3</sub> (- —).

Figure S12

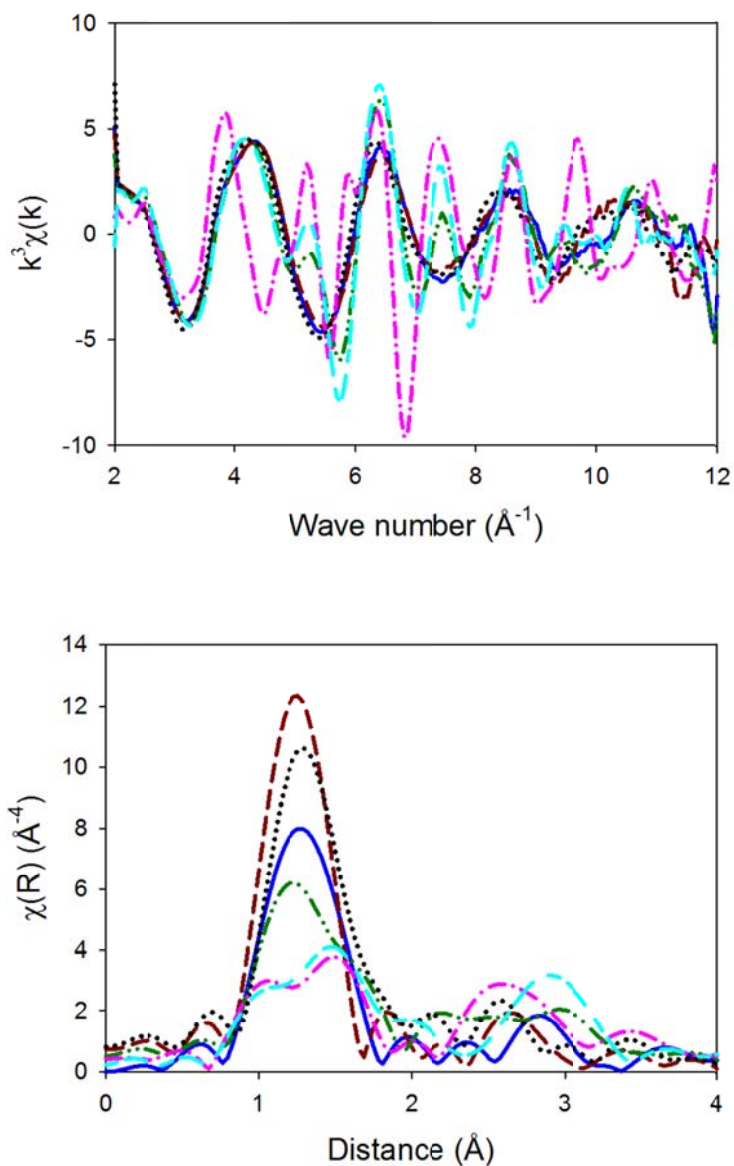

**Fig S12** V K-edge EXAFS spectra (top) and Fourier transform of EXAFS spectra (bottom) for VF<sub>2</sub>O<sub>x</sub> aerogels: 300-O<sub>2</sub> (—), 300-Ar-O<sub>2</sub> (---), 300-Ar (—•—), and as-synthesized (•••). Vanadium oxide standards: V<sub>2</sub>O<sub>5</sub> (—•—) and VO<sub>2</sub> (— —).
